# Supplementary material for: Air quality in Delhi during the Commonwealth Games
Source: Copernicus journal article supplement (doi:10.5194/acp-14-10619-2014), 2014-10-09
Supplement: Supplementary file 1 [file acp-14-10619-2014-supplement.pdf]

Supplement of Atmos. Chem. Phys., 14, 10619–10630, 2014  
<http://www.atmos-chem-phys.net/14/10619/2014/>  
doi:10.5194/acp-14-10619-2014-supplement  
© Author(s) 2014. CC Attribution 3.0 License.

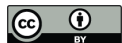

*Supplement of*

## **Air quality in Delhi during the Commonwealth Games**

**P. Marrapu et al.**

*Correspondence to:* P. Marrapu ([pallavi-marrapu@uiowa.edu](mailto:pallavi-marrapu@uiowa.edu))

44 Table S1 Comparison of 20-day mean observed and predicted concentrations of various species  
45 at all monitoring sites with Original Emissions

46

| <b>NO<sub>x</sub>-<br/>Full</b> | <b>BC<br/>(<math>\mu\text{g}/\text{m}^3</math>)</b> | <b>CO<br/>(ppmv)</b> | <b>NO<sub>x</sub><br/>(ppbv)</b> | <b>O<sub>3</sub><br/>(ppbv)</b> | <b>O<sub>3</sub>-<br/>DayTime(ppbv)</b> | <b>PM<sub>2.5</sub><br/>(<math>\mu\text{g}/\text{m}^3</math>)</b> | <b>PM<sub>10</sub><br/>(<math>\mu\text{g}/\text{m}^3</math>)</b> |
|---------------------------------|-----------------------------------------------------|----------------------|----------------------------------|---------------------------------|-----------------------------------------|-------------------------------------------------------------------|------------------------------------------------------------------|
| <b>Mean-<br/>obs</b>            | <b>9.5</b>                                          | <b>1.7</b>           | <b>67.8</b>                      | <b>30.1</b>                     | <b>54.5</b>                             | <b>110.8</b>                                                      | <b>237.6</b>                                                     |
| <b>Mean-<br/>model</b>          | <b>13.8</b>                                         | <b>1.0</b>           | <b>150.3</b>                     | <b>26.3</b>                     | <b>60.4</b>                             | <b>181.5</b>                                                      | <b>294.3</b>                                                     |
| <b>Bias</b>                     | <b>10.1</b>                                         | <b>-0.5</b>          | <b>91.3</b>                      | <b>0.3</b>                      | <b>12.5</b>                             | <b>83.6</b>                                                       | <b>83.5</b>                                                      |
| <b>RMSE</b>                     | <b>15.7</b>                                         | <b>1.4</b>           | <b>170.3</b>                     | <b>29.2</b>                     | <b>40.6</b>                             | <b>162.8</b>                                                      | <b>259.5</b>                                                     |
| <b>R</b>                        | <b>0.6</b>                                          | <b>0.4</b>           | <b>0.4</b>                       | <b>0.7</b>                      | <b>0.4</b>                              | <b>0.4</b>                                                        | <b>0.4</b>                                                       |

47

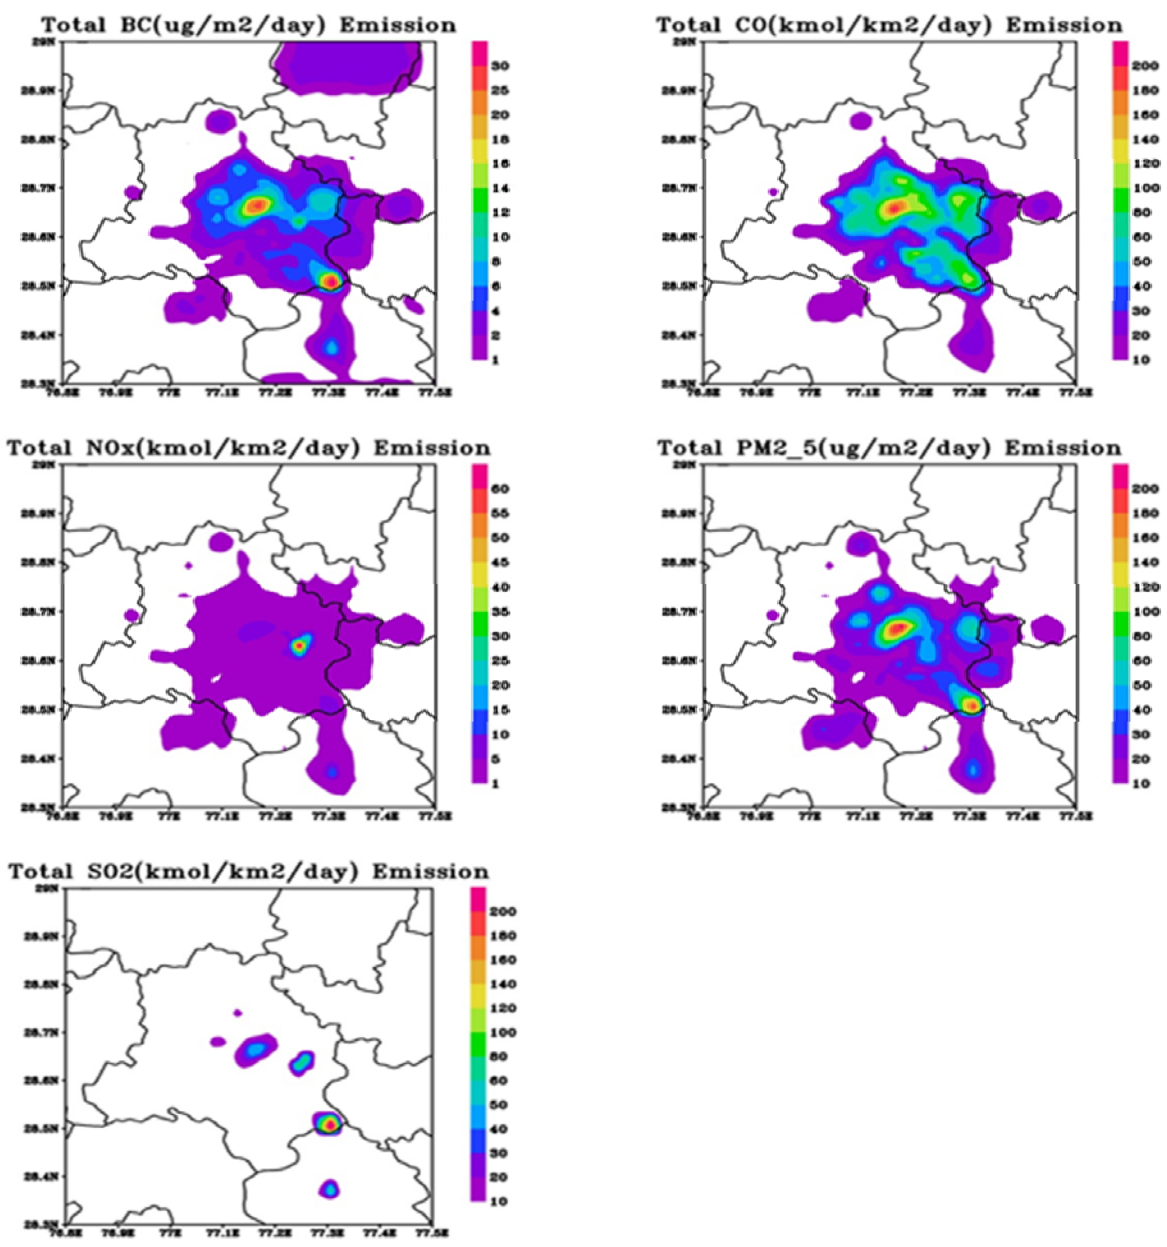

48

49 Fig S1 . Emission distributions of BC, CO, NO<sub>x</sub>, PM<sub>2.5</sub> and SO<sub>2</sub> units over Delhi.

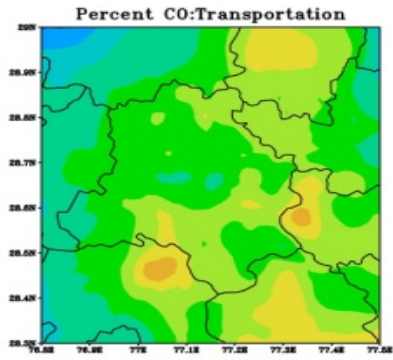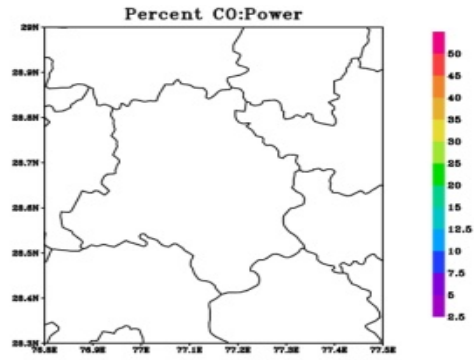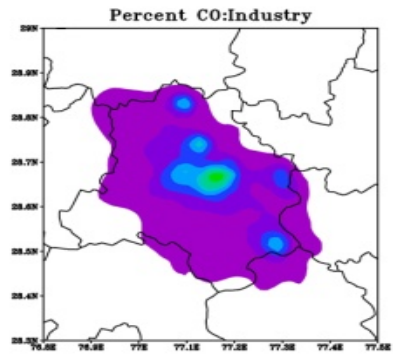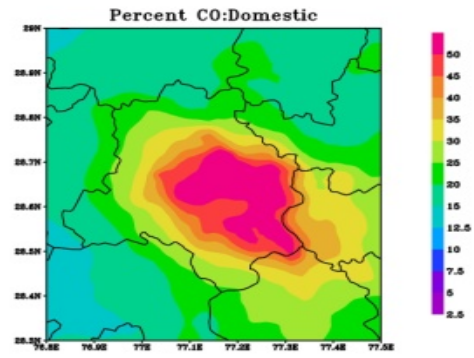

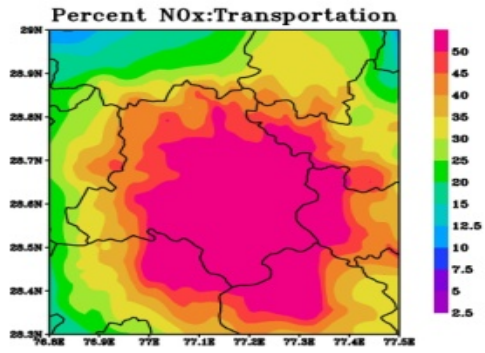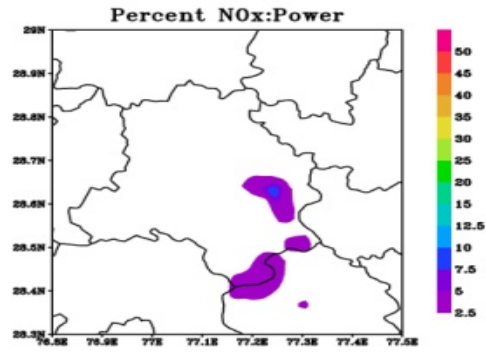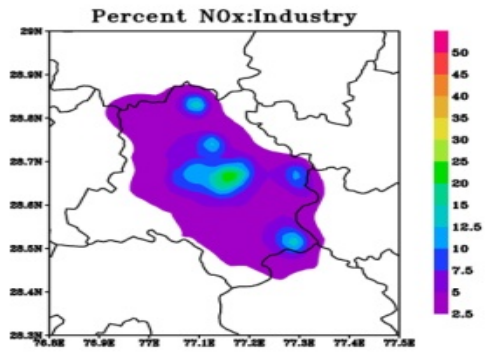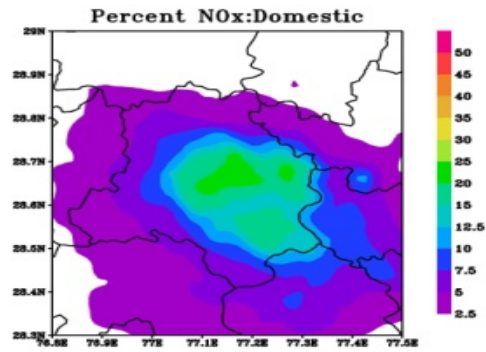

51

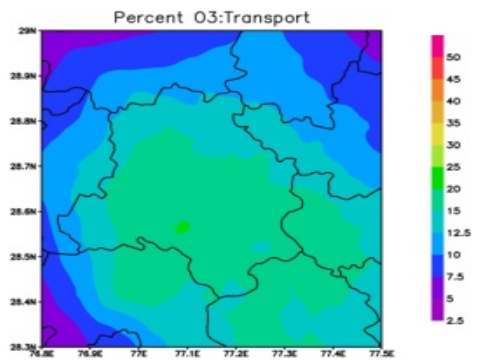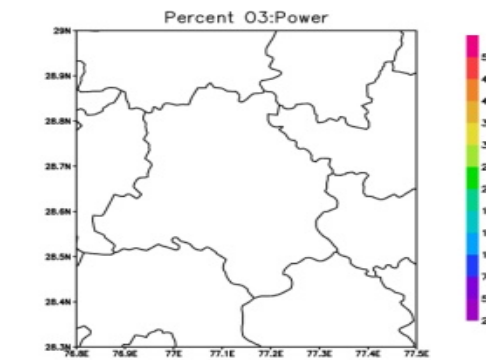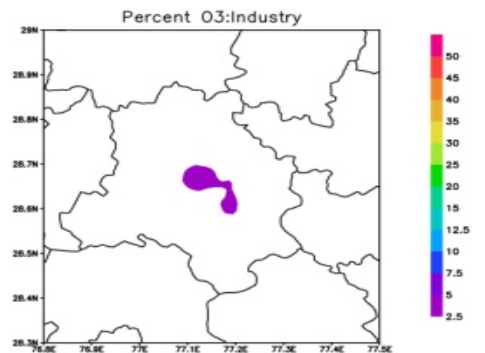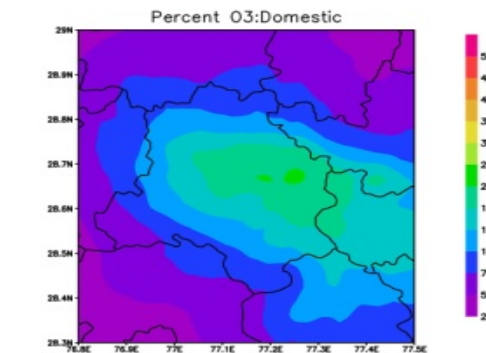

52

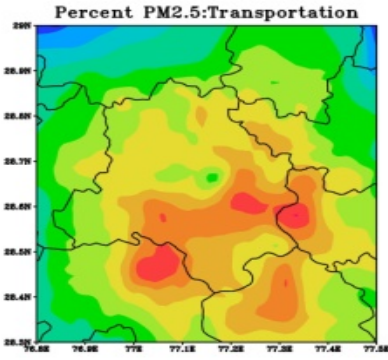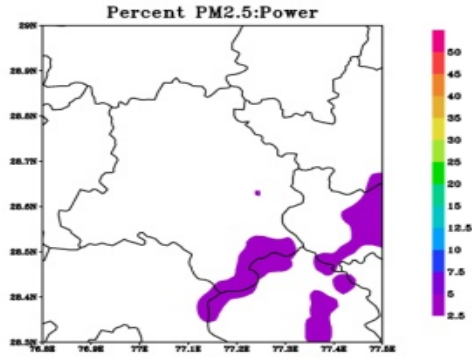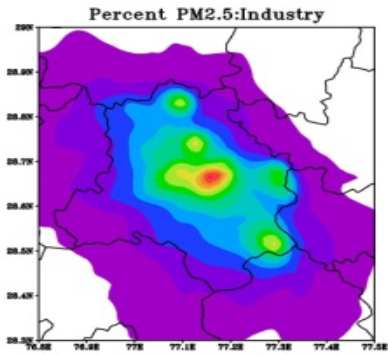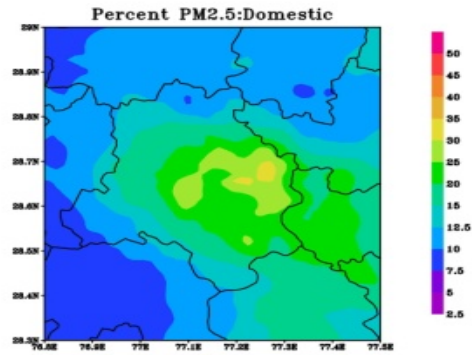

53

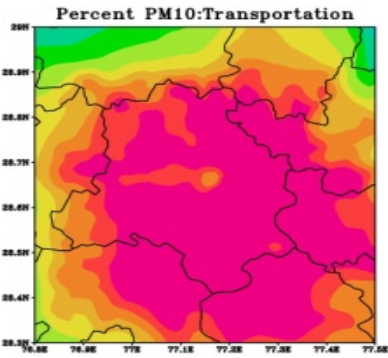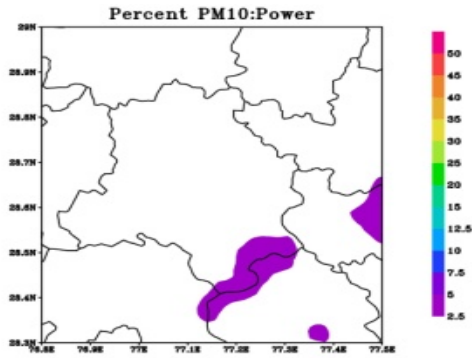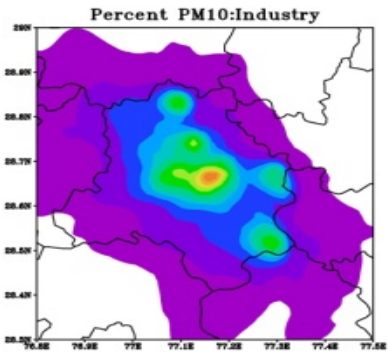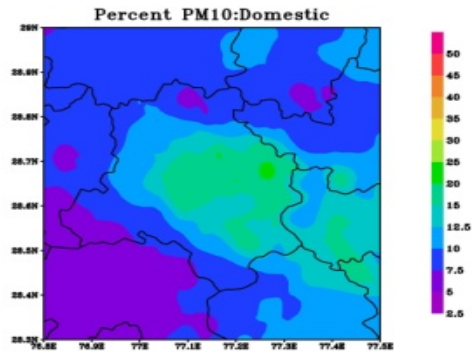

54

55

56

57

58



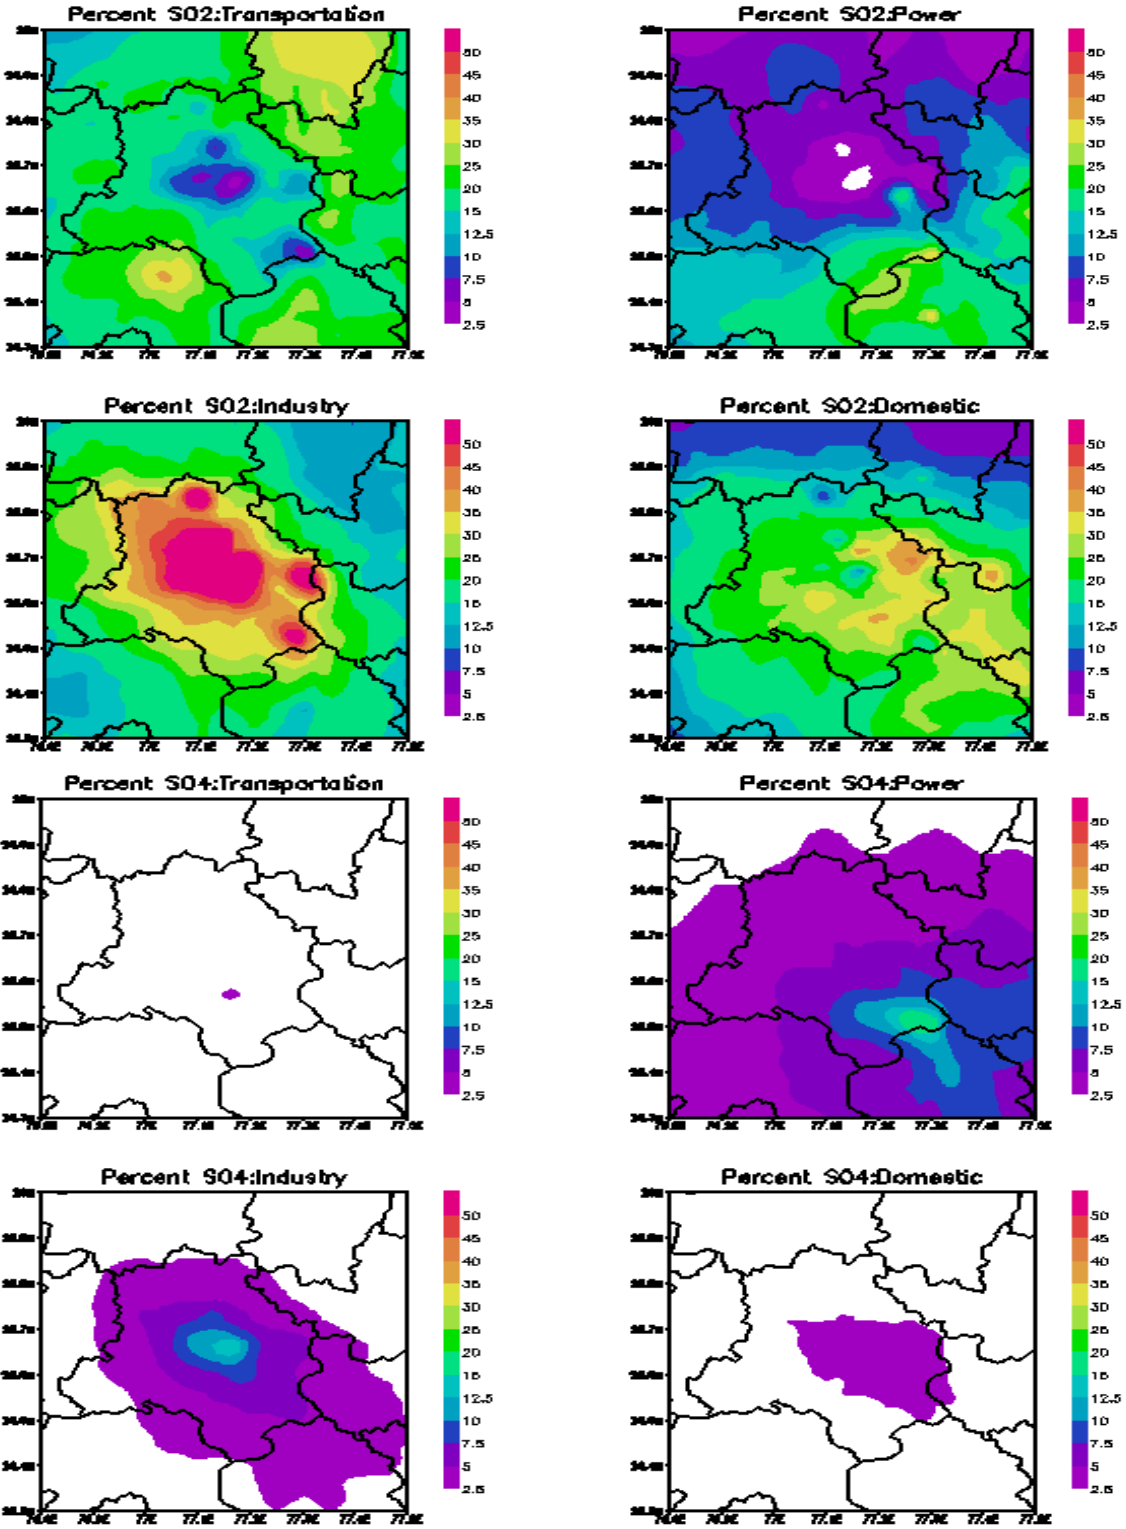

59

60

61 Fig S2. Twenty day mean percent contribution of each pollutant from different sectors.

62
